# Supplementary material
Source: publisher site journal article supplement (https://www.dovepress.com/article/452221)
Supplement: Supplementary file 1 [file get_supplementary_file.php]

***Supplementary material***

**Exploring the Multifaceted Landscape of Pediatric Obstructive Sleep Apnea: Insights into Prevalence, Severity, and Coexisting Conditions**

Qin Yang1,2, Xiao Huang2, Yanhong Lin1, Ke Chen1, Qinghua Lu1, Weinan Lin1, Xing Wang2, Yishu Teng3, Peng Jiang3, Sandip Patil3*, Yuejie Zheng1*

1. Department of Respiratory Medicine, Shenzhen Children’s Hospital, Shenzhen, Guangdong Province, People’s Republic of China
2. Department of Sleep Centre, Shenzhen Children’s Hospital, Shenzhen, Guangdong Province, People’s Republic of China
3. Department of Haematology and Oncology, Shenzhen Children's Hospital, Shenzhen, Guangdong Province, People’s Republic of China

*** Corresponding Author:**

- - - 1. **Dr Sandip Patil**

Department of Haematology and Oncology,

Shenzhen Children's Hospital, Shenzhen, Guangdong Province, People’s Republic of China

E-mail: sandippatil1309@yahoo.com

Phone:+85-755-82008283

- - - 1. **Professor Yuejie Zheng**

Department of Respiratory Medicine,

Shenzhen Children’s Hospital, Shenzhen, Guangdong Province, People’s Republic of China E-mail: shine1990@sina.com

**S1**
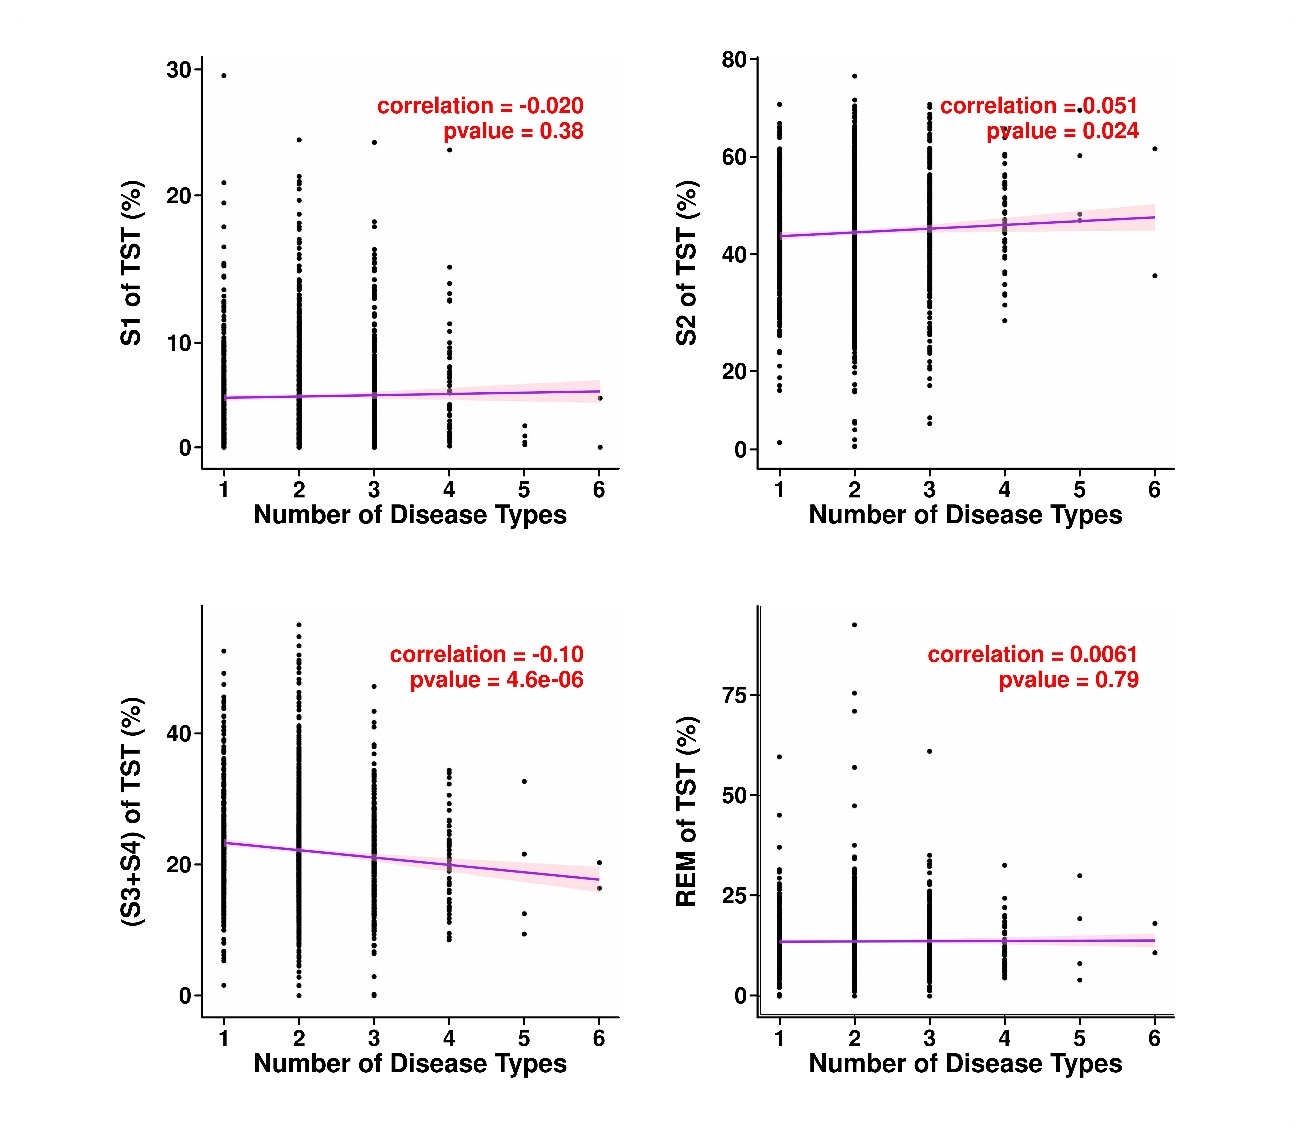


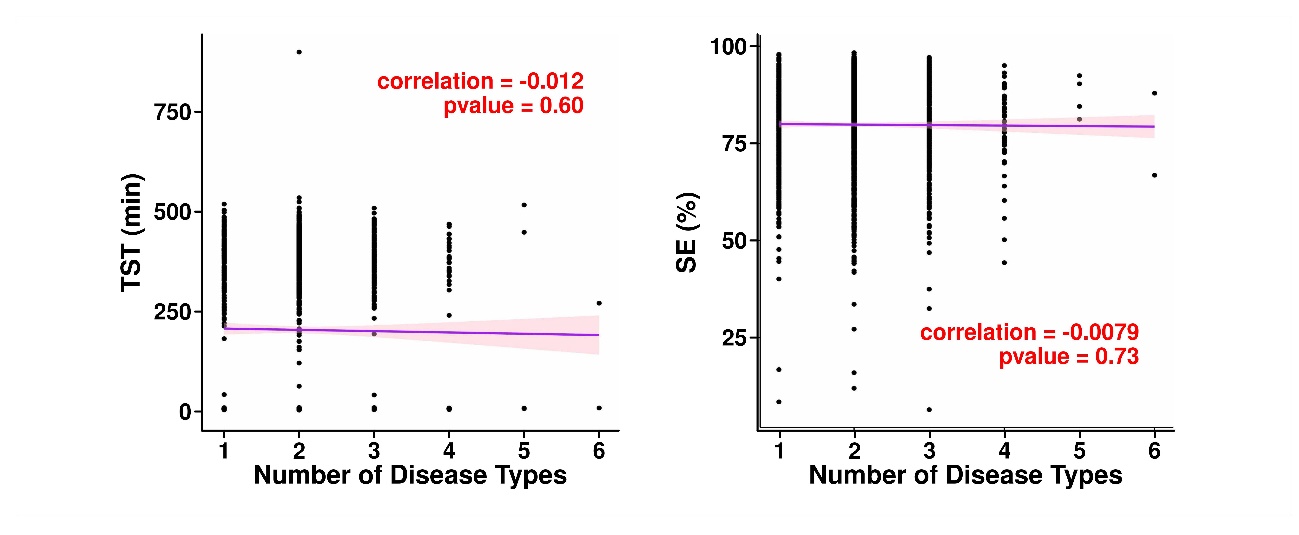


Fig S1. Analysis demonstrated several noteworthy correlations

Note: TST: Total Sleep Time; REM: Rapid Eye Movement

**S2**


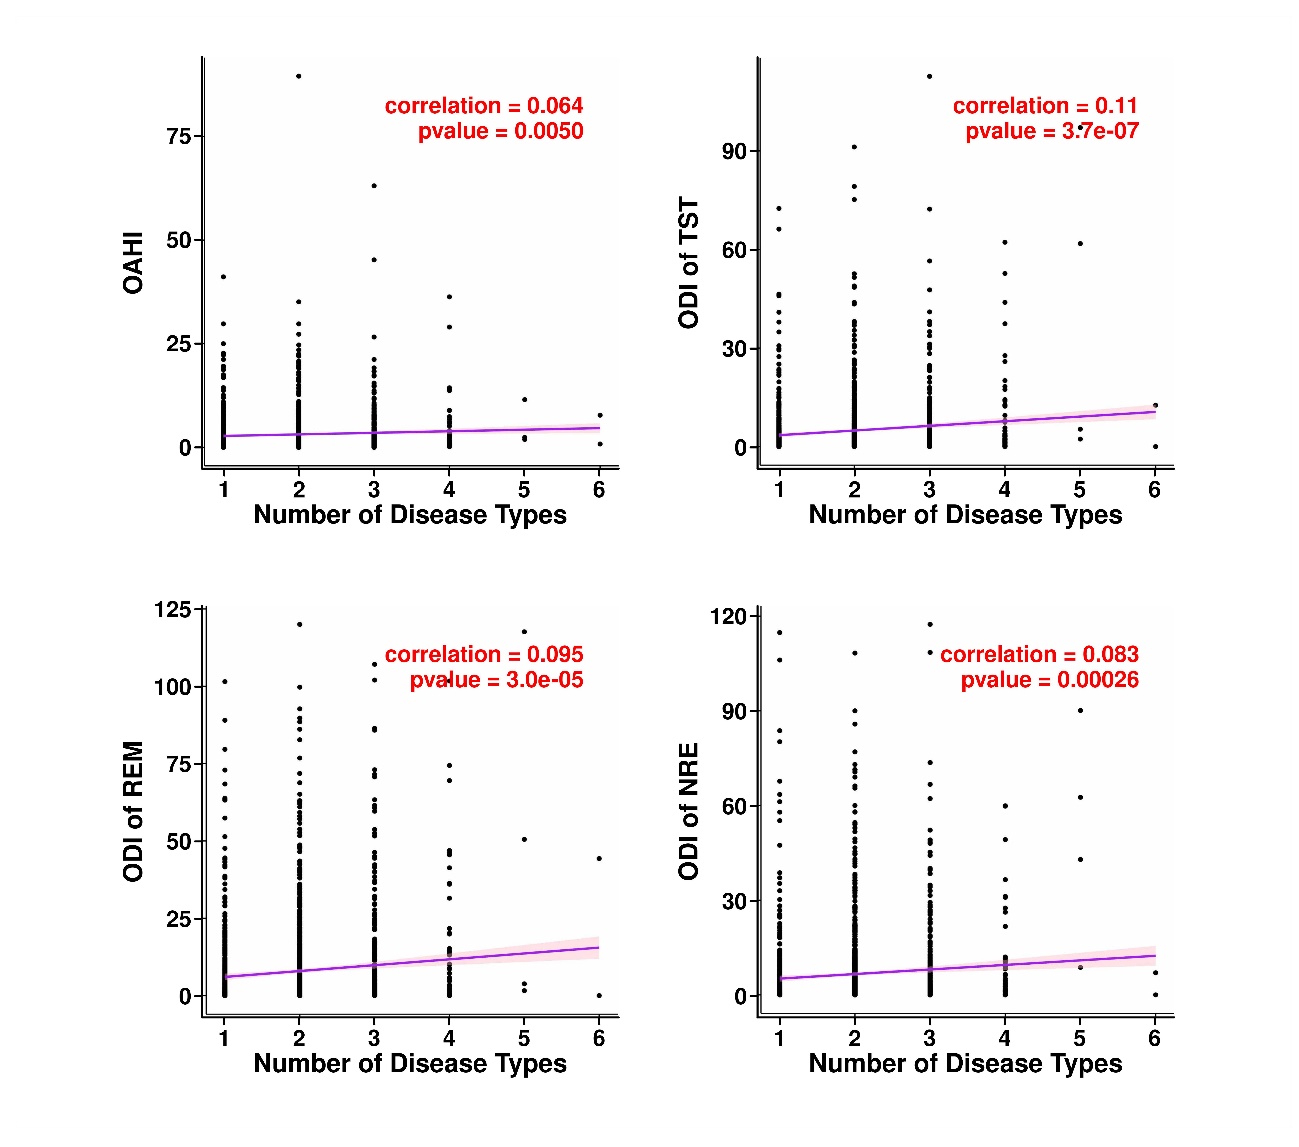


Fig S2. The Hypopnea Index (HI) exhibited positive correlations with various Oxygen Desaturation Indices (ODI) thresholds
